# Supplementary material for: Single-molecule magnet behaviour in a Dy(iii) pentagonal bipyramidal complex with a quasi-linear Cl–Dy–Cl sequence
Source: Royal Society of Chemistry journal article supplement (doi:10.1039/c8dt04098b), 2018-11-08
Supplement: c8dt04098b1.pdf [file c8dt04098b1.pdf]

## SUPPORTING INFORMATION

### Single-molecule magnet behaviour in a Dy(III) pentagonal bipyramidal complex with a quasi linear Cl-Dy-Cl sequence

Jérôme Long,<sup>\*a</sup> Alexander N. Selikhov,<sup>b</sup> Ekaterina Mamontova,<sup>a</sup> Konstantin A. Lyssenko,<sup>c</sup>  
Yannick Guari,<sup>a</sup> Joulia Larionova<sup>a</sup> and Alexander A. Trifonov<sup>\*b,c</sup>

<sup>a</sup>*Institut Charles Gerhardt, Equipe Ingénierie Moléculaire et Nano-Objets, Université de Montpellier, ENSCM, CNRS. Place Eugène Bataillon, 34095 Montpellier Cedex 5, France*

<sup>b</sup>*Institute of Organometallic Chemistry of Russian Academy of Sciences, 49 Tropinina str., GSP-445, 630950, Nizhny Novgorod, Russia. E-mail: trif@iomc.ras.ru*

<sup>c</sup>*Institute of Organoelement Compounds of Russian Academy of Sciences, 28 Vavilova str., 119334, Moscow, Russia.*

## TABLE OF CONTENTS

|                                                                                                                                                                                                                                     |    |
|-------------------------------------------------------------------------------------------------------------------------------------------------------------------------------------------------------------------------------------|----|
| Experimental Section                                                                                                                                                                                                                | 3  |
| General Procedure.                                                                                                                                                                                                                  | 3  |
| Synthesis of $[\text{DyCl}_2(\text{THF})_5][\text{B}(\text{C}_6\text{H}_5)_4] \cdot 0.5(\text{THF})$ ( <b>1</b> ).                                                                                                                  | 3  |
| X-Ray crystallography.                                                                                                                                                                                                              | 3  |
| Magnetic Measurements.                                                                                                                                                                                                              | 3  |
| Photoluminescence measurements                                                                                                                                                                                                      | 4  |
| <br>                                                                                                                                                                                                                                |    |
| Scheme 1: Synthesis of complex <b>1</b> .....                                                                                                                                                                                       | 5  |
| <br>                                                                                                                                                                                                                                |    |
| Figure S1: Perspective view of the crystal packing for <b>1</b> along the <i>a</i> crystallographic axis. Hydrogen atoms have been omitted for clarity. ....                                                                        | 4  |
| Figure S2: Temperature dependence of $\chi T$ under an applied magnetic field of 1000 Oe for <b>1</b> . Inset: field dependence of the magnetization at 1.8 K for <b>1</b> .....                                                    | 5  |
| Figure S3: Cole-Cole (Argand) plots obtained using the ac susceptibility data for <b>1</b> (0 Oe). The solid lines correspond to the best fit obtained with a generalized Debye model.....                                          | 5  |
| Figure S4: Temperature dependence of $\chi'$ and $\chi''$ for <b>1</b> for different frequencies. ....                                                                                                                              | 6  |
| Figure S5: Left: Frequency dependence of $\chi'$ and $\chi''$ for <b>1</b> for various dc fields at 6 K. Right: Field dependence of the relaxation time for <b>1</b> at 6 K. The red solid line represents the fit with Eq. 2. .... | 7  |
| Figure S6: Frequency dependence of $\chi'$ and $\chi''$ for <b>1</b> under a 1000 Oe dc field.....                                                                                                                                  | 7  |
| Figure S7: Cole-Cole (Argand) plot obtained using the ac susceptibility data for <b>1</b> (1000 Oe). The solid lines correspond to the best fit obtained with a generalized Debye model.....                                        | 8  |
| Figure S8: Orientation of the anisotropic axis (purple) in <b>1</b> obtained from the MAGELLAN software.....                                                                                                                        | 9  |
| Figure S9: Absorption spectrum of <b>1</b> in THF. ....                                                                                                                                                                             | 10 |
| Figure S10: Room temperature excitation spectrum for <b>1</b> acquired at different emission wavelengths. ....                                                                                                                      | 10 |
| Figure S11: Low temperature (77 K) excitation spectra for <b>1</b> acquired at different excitation wavelengths. ....                                                                                                               | 11 |
| <br>                                                                                                                                                                                                                                |    |
| Table S1: SHAPE analysis for <b>1</b> . ....                                                                                                                                                                                        | 10 |
| Table S2: Fitting of the Cole-Cole plots with a generalized Debye model for temperature ranging from 1.8 to 7.2 K under a zero dc field for <b>1</b> .....                                                                          | 10 |
| Table S3: Fit parameters of the field dependence of the relaxation time at 6 K for <b>1</b> . ....                                                                                                                                  | 10 |
| Table S4. Fitting of the Cole-Cole plots with a generalized Debye model for temperature ranging from 4.5 to 7.0 K under a 1000 Oe dc field for <b>1</b> .....                                                                       | 11 |

## EXPERIMENTAL SECTION

**General Procedure.** All operations were carried out under an atmosphere of argon using Schlenk techniques or in a nitrogen filled glovebox. After drying over KOH, THF was purified by distillation from sodium/benzophenoneketyl. Unsolvated DyCl<sub>3</sub> was synthesized according to a standard procedure by the way of subliming the mixture of DyCl<sub>3</sub> and NH<sub>4</sub>Cl.<sup>1</sup> NaBPh<sub>4</sub> was purchased from Aldrich and was used without further purification. Lanthanide metal analysis was carried out by complexometric titration.<sup>2</sup> IR spectra were recorded as Nujol mulls on a Bruker-Vertex 70 spectrophotometer. Elemental analysis was performed in the microanalytical laboratory of IOMC.

**Synthesis of [DyCl<sub>2</sub>(THF)<sub>5</sub>][B(C<sub>6</sub>H<sub>5</sub>)<sub>4</sub>]·0.5(THF) (1).** Anhydrous DyCl<sub>3</sub> (1.15 g, 4.30 mmol) was suspended in THF (10 mL) and stirred at room temperature for 12 h. Then dry NaBPh<sub>4</sub> (1.47 g, 4.30 mmol) was added to the suspension and the solution was quickly heated to 70 °C. The resulting cloudy solution was stirred at 40 °C for 24 h. Then, the solution was brought to room temperature and filtered from the insoluble precipitate of NaCl. Complex **1** was isolated as colorless crystals by slow diffusion of hexane into the THF solution of the complex, in an almost quantitative yield 86 % (3.36 g). Complex **1** crystallized as a solvate [DyCl<sub>2</sub>(THF)<sub>5</sub>][B(C<sub>6</sub>H<sub>5</sub>)<sub>4</sub>]·0.5(THF). Elemental analysis calcd. (%) for C<sub>46</sub>H<sub>63.50</sub>BCl<sub>2</sub>DyO<sub>5.50</sub> (948.67 g·mol<sup>-1</sup>): C, 58.21; H, 6.80; Dy, 17.12; found (%): C, 58.02; H, 6.87; Dy, 17.24. IR (Nujol, KBr) ν/cm<sup>-1</sup>: 1952 (w), 1884 (w), 1821 (w), 1576 (m), 1560 (w), 1344 (m), 1295 (w), 1245 (m), 1177 (s), 1017 (s), 919 (s), 846 (s), 703 (m), 672 (m), 606 (m).

### X-Ray crystallography.

Crystals of **1** [C<sub>46</sub>H<sub>63.50</sub>BCl<sub>2</sub>DyO<sub>5.50</sub>, FW= 948.67, cryst. from THF-hexane] are triclinic, space group P-1, at 120(2) K  $a = 12.5166(5)\text{\AA}$ ,  $b = 12.7218(5)\text{\AA}$ ,  $c = 29.2642(12)\text{\AA}$ ,  $\alpha = 79.4431(9)^\circ$ ,  $\beta = 79.7267(10)^\circ$ ,  $\gamma = 82.1866(9)^\circ$ ,  $V = 4481.8(3)\text{\AA}^3$ ,  $Z(Z') = 4(2)$ ,  $d_{\text{calc}} = 1.406\text{gcm}^{-3}$ ,  $\lambda(\text{MoK}\alpha) = 18.31\text{ cm}^{-1}$ . Intensities of 109457 reflections were measured with Bruker APEX-II CCD [ $\lambda(\text{MoK}\alpha) = 0.71072\text{\AA}$ ,  $2\theta < 58$ ] and 23822 independent reflections ( $R_{\text{int}} = 0.0574$ ) were used in the further refinement. The structure was solved by direct method and refined by the full-matrix least-squares technique against  $F^2$  in the anisotropic-isotropic approximation. Analysis of the Fourier density synthesis as well as displacement parameters clearly show that two of THF molecules are disordered. The refinement of the disordered part has been performed with restraints (DFIX and EADP). The refinement converged to  $wR_2 = 0.0777$  and  $\text{GOF} = 1.023$  for all independent reflections ( $R_1 = 0.0388$  was calculated against  $F$  for 18731 observed reflections with  $I > 2\sigma(I)$ ). All calculations were performed using SHELXTL-2014/6. Crystallographic data for the structure **1** was deposited at the Cambridge Crystallographic Data Centre as supplementary no. CCDC 1867504.

### Magnetic Measurements.

Magnetic susceptibility data were collected with a Quantum Design MPMS-XL SQUID magnetometer working in the range 1.8 – 350 K with the magnetic field up to 7 Tesla. The sample were prepared in a glove box. The data were corrected for the sample holder and the diamagnetic contributions calculated from the Pascal's constants. The ac magnetic susceptibility measurements were carried out in the presence of a 3 Oe oscillating field in zero or applied external dc field.

**Photoluminescence measurements**

The solid sample was sealed in a quartz tube in an argon atmosphere (glove box). The emission and excitation spectra were recorded at 77 K and 295 K using a spectrofluorimeter Edinburgh FLS-920. The excitation source was a 450 W Xe arc lamp. The emission spectra were corrected for detection and optical spectral response of the spectrofluorimeter. Low temperature measurements (77 K) were performed using a liquid nitrogen dewar (quartz).

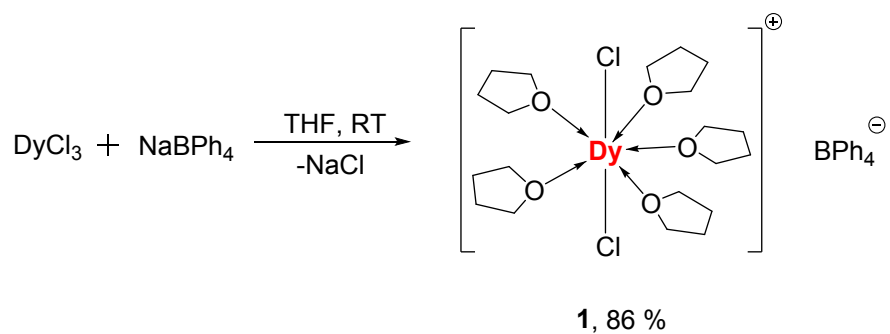

**Scheme 1:** Synthesis of complex **1**.

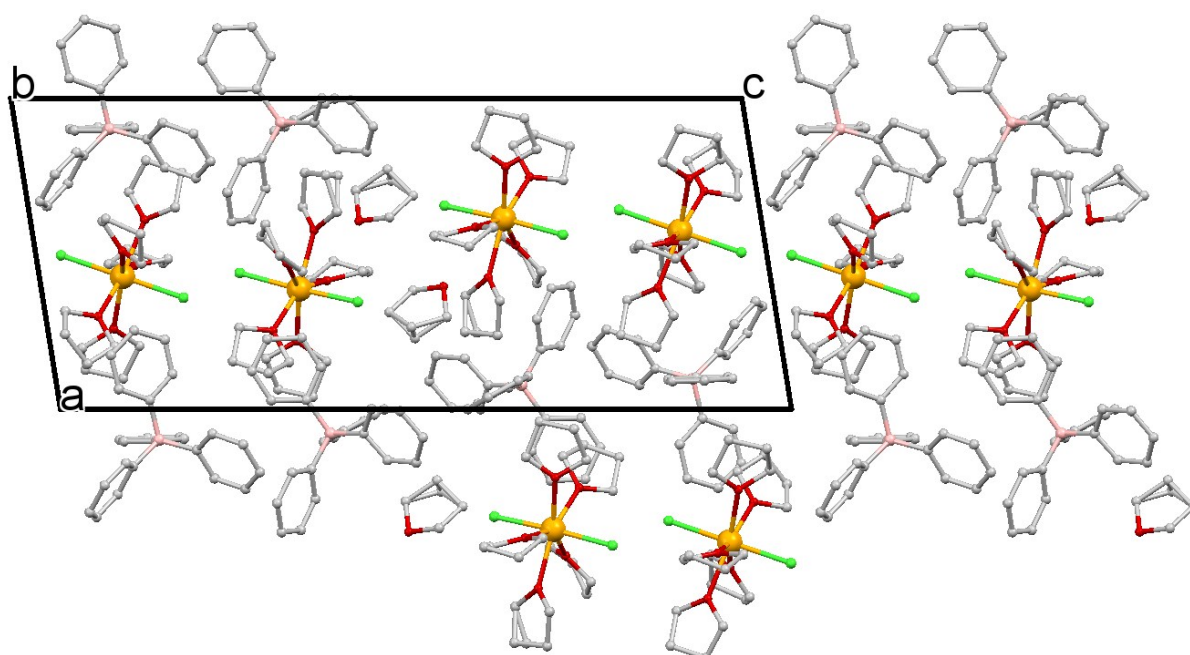

**Figure S1:** Perspective view of the crystal packing for **1** along the *a* crystallographic axis. Hydrogen atoms have been omitted for clarity.

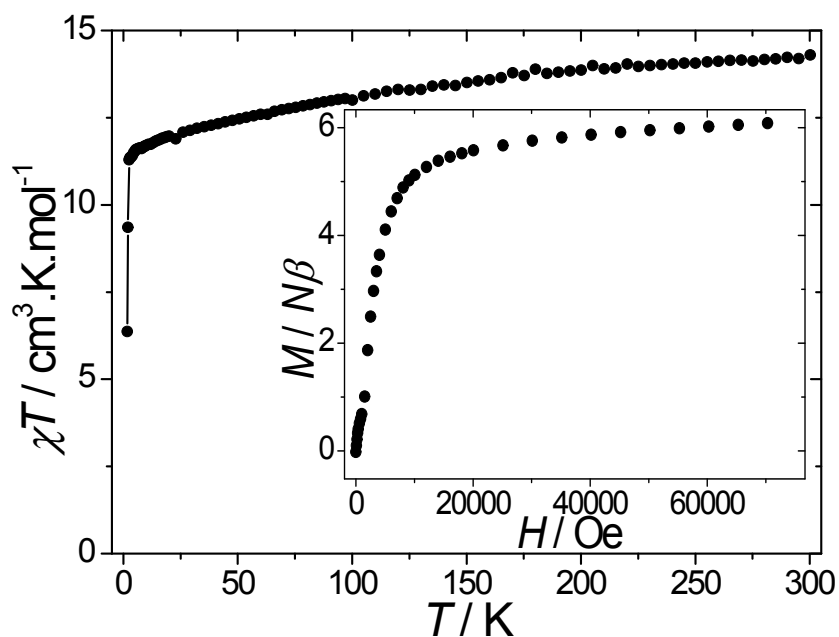

**Figure S2:** Temperature dependence of  $\chi T$  under an applied magnetic field of 1000 Oe for **1**. Inset: field dependence of the magnetization at 1.8 K for **1**.

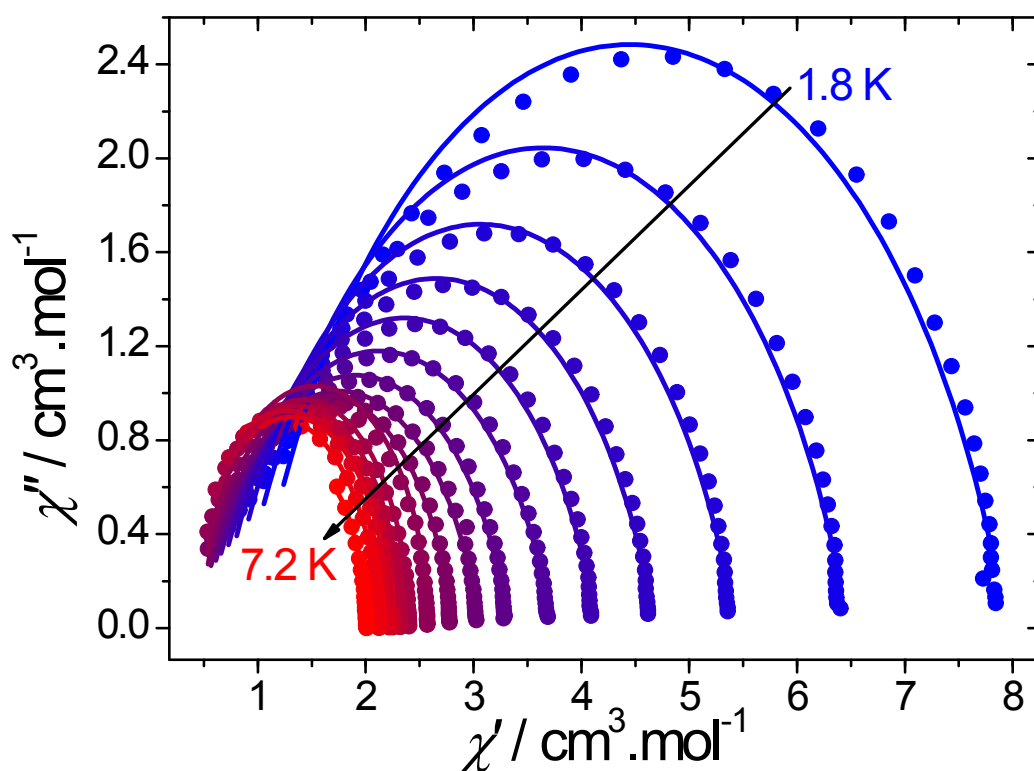

**Figure S3:** Cole-Cole (Argand) plots obtained using the ac susceptibility data for **1** (0 Oe). The solid lines correspond to the best fit obtained with a generalized Debye model.

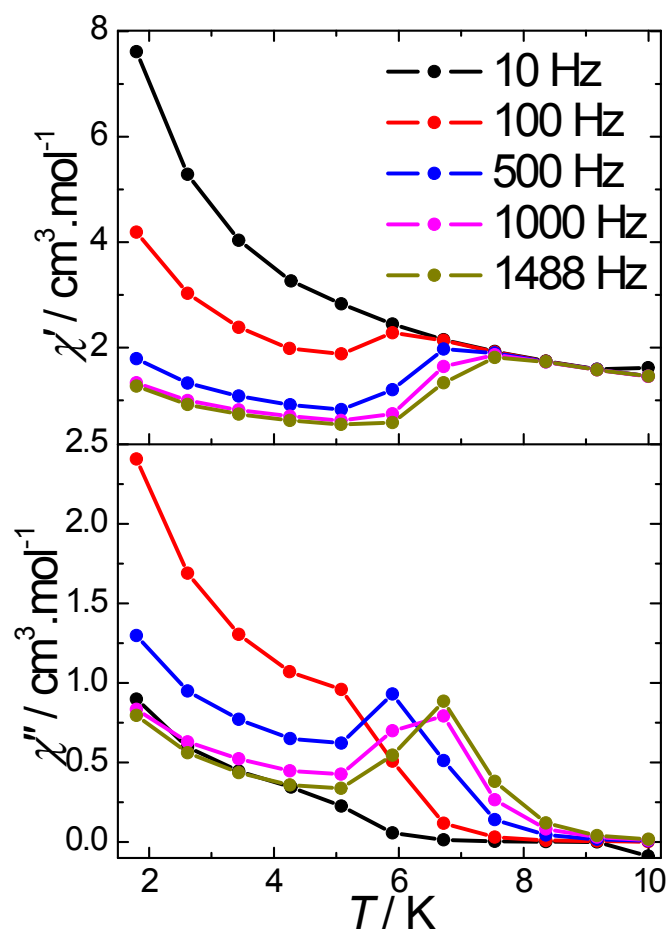

**Figure S4:** Temperature dependence of  $\chi'$  and  $\chi''$  for **1** for different frequencies.

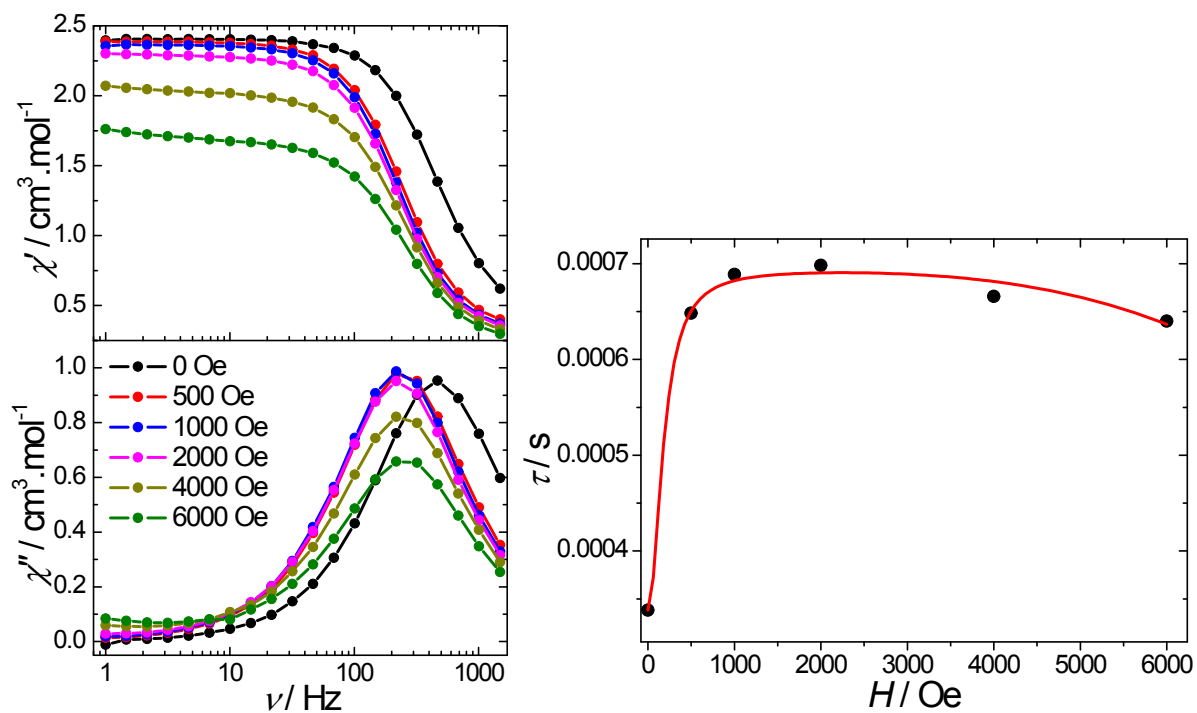

**Figure S5:** Left: Frequency dependence of  $\chi'$  and  $\chi''$  for **1** for various dc fields at 6 K. Right: Field dependence of the relaxation time for **1** at 6 K. The red solid line represents the fit with Eq. 2.

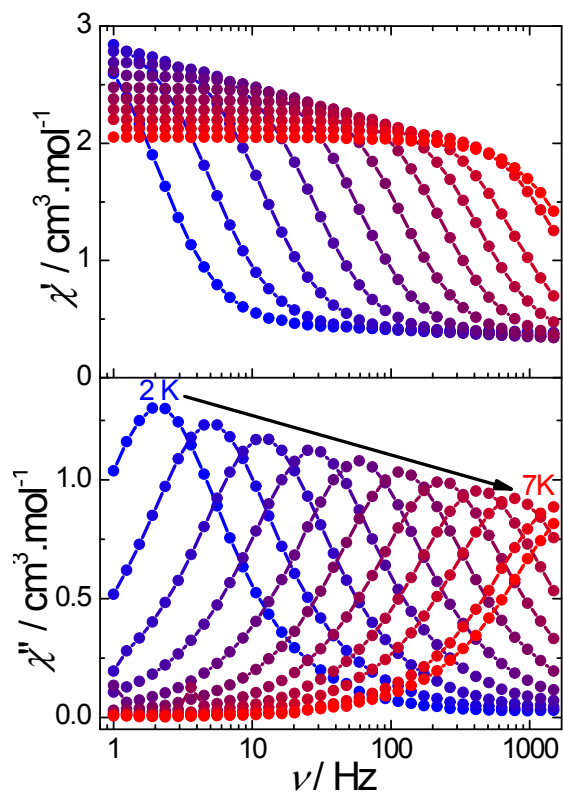

**Figure S6:** Frequency dependence of  $\chi'$  and  $\chi''$  for **1** under a 1000 Oe dc field.



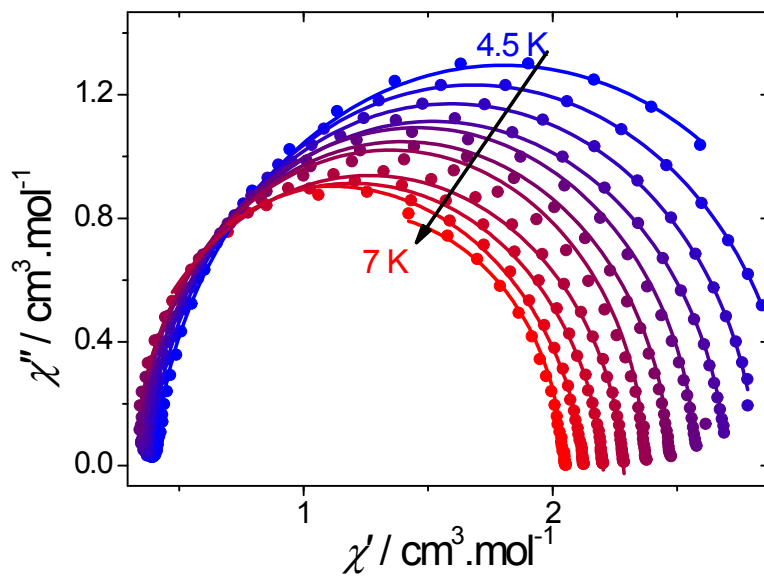

**Figure S7:** Cole-Cole (Argand) plot obtained using the ac susceptibility data for 1 (1000 Oe). The solid lines correspond to the best fit obtained with a generalized Debye model.

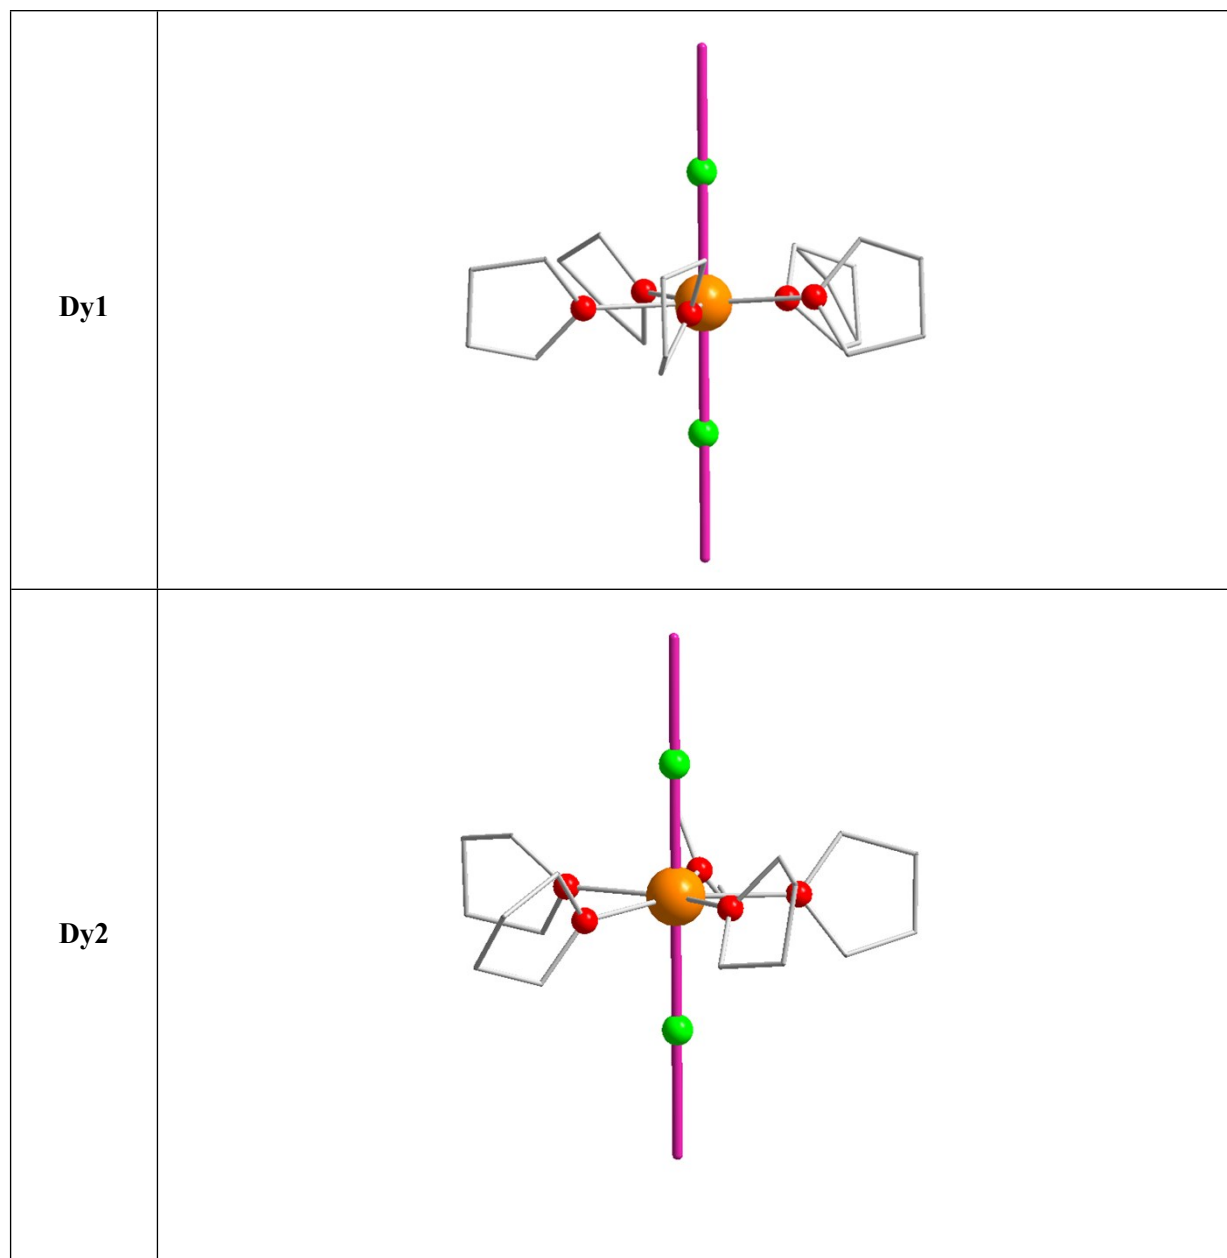

**Figure S8:** Orientation of the anisotropic axis (purple) in **1** obtained from the MAGELLAN software.

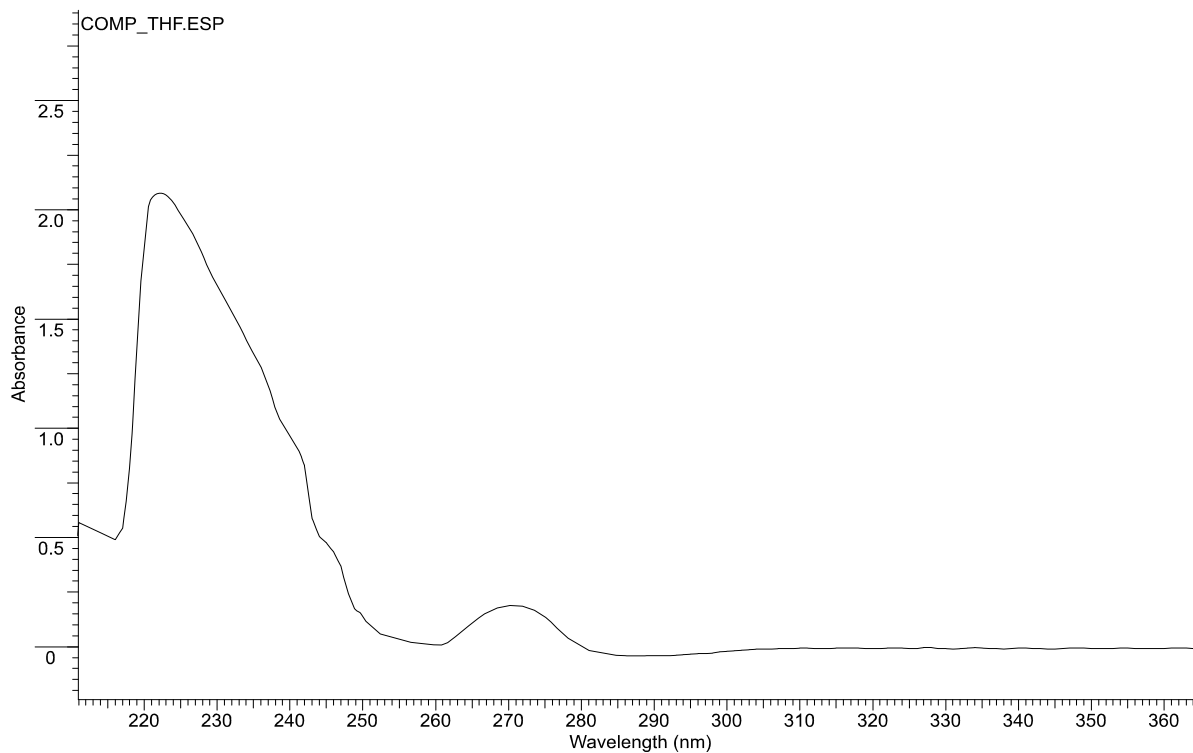

**Figure S9:** Absorption spectrum of **1** in THF.

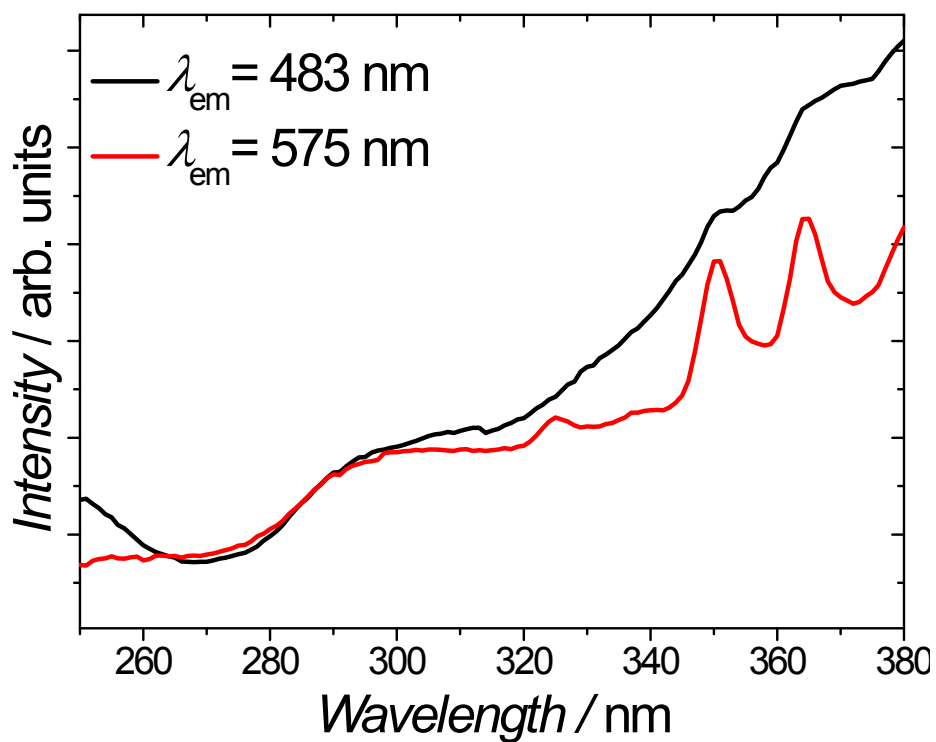

**Figure S10:** Room temperature excitation spectrum for **1** acquired at different emission wavelengths.

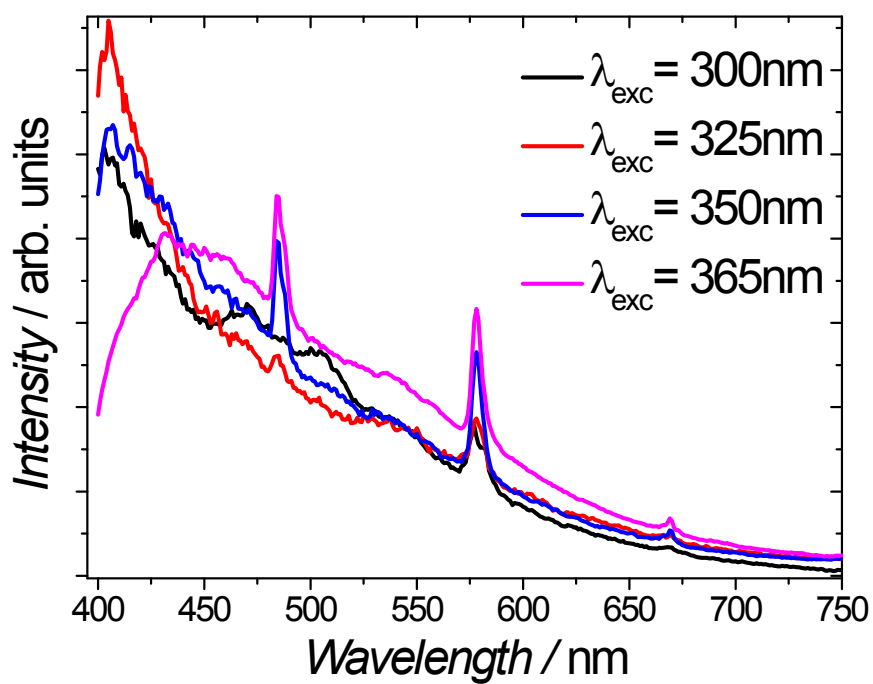

**Figure S11:** Low temperature (77 K) excitation spectra for **1** acquired at different excitation wavelengths.

**Table S1:** SHAPE analysis for **1**.

|            | HP     | HPY    | PBPY  | COC   | CTPR  | JPBPY | JETPY  |
|------------|--------|--------|-------|-------|-------|-------|--------|
| <b>Dy1</b> | 34.478 | 26.321 | 0.219 | 7.256 | 5.527 | 4.991 | 23.915 |
| <b>Dy2</b> | 34.847 | 26.312 | 0.244 | 7.304 | 5.585 | 5.142 | 24.375 |

HP: Heptagon  
 HPY: Hexagonal pyramid  
 PBPY: Pentagonal Bipyramid  
 COC: Capped Octahedron  
 CTPR: Capped trigonal prism  
 JPBPY: Johnson pentagonal bipyramid J13  
 JETPY: Johnson elongated triangular pyramid J7

**Table S2:** Fitting of the Cole-Cole plots with a generalized Debye model for temperature ranging from 1.8 to 7.2 K under a zero dc field for **1**.

| $T$ (K) | $\chi_s$ (cm <sup>3</sup> . mol <sup>-1</sup> ) | $\chi_T$ (cm <sup>3</sup> . mol <sup>-1</sup> ) | $\alpha$    |
|---------|-------------------------------------------------|-------------------------------------------------|-------------|
| 1.8     | 1.74634                                         | 7.15696                                         | 0.26688     |
| 2.22    | 1.42134                                         | 5.87117                                         | 0.25043     |
| 2.64    | 1.19728                                         | 4.93623                                         | 0.24359     |
| 3.06    | 1.03659                                         | 4.27193                                         | 0.23411     |
| 3.48    | 0.92375                                         | 3.78996                                         | 0.2275      |
| 3.9     | 0.83877                                         | 3.40241                                         | 0.23299     |
| 4.32    | 0.74318                                         | 3.07156                                         | 0.20394     |
| 4.74    | 0.67181                                         | 2.8441                                          | 0.1817      |
| 5.16    | 0.57872                                         | 2.66723                                         | 0.11696     |
| 5.58    | 0.48971                                         | 2.56247                                         | 0.00905     |
| 5.98    | 0.4397                                          | 2.39287                                         | 0.00903     |
| 6.2     | 0.42526                                         | 2.31818                                         | 4.64529E-5  |
| 6.38    | 0.32319                                         | 2.21484                                         | 0.04235     |
| 6.5     | 0.41384                                         | 2.21309                                         | 3.51806E-14 |
| 6.78    | 0.24311                                         | 2.08388                                         | 0.04459     |
| 7.2     | 0.43152                                         | 1.99703                                         | 0.00937     |

**Table S3:** Fit parameters of the field dependence of the relaxation time at 6 K for **1**.

| <i>Compound</i> | <i>D (s<sup>-1</sup>K<sup>-1</sup>Oe<sup>-4</sup>)</i> | <i>B<sub>1</sub> (s<sup>-1</sup>)</i> | <i>B<sub>2</sub> (Oe<sup>-2</sup>)</i> | <i>K</i> |
|-----------------|--------------------------------------------------------|---------------------------------------|----------------------------------------|----------|
| <b>1</b> (6 K)  | 1.16 × 10 <sup>-14</sup>                               | 93218                                 | 2.09 × 10 <sup>-3</sup>                | 226.22   |

**Table S4.** Fitting of the Cole-Cole plots with a generalized Debye model for temperature ranging from 4.5 to 7.0 K under a 1000 Oe dc field for **1**.

| <i>T</i> (K) | <i>χ<sub>S</sub></i> (cm <sup>3</sup> . mol <sup>-1</sup> ) | <i>χ<sub>T</sub></i> (cm <sup>3</sup> . mol <sup>-1</sup> ) | <i>α</i>   |
|--------------|-------------------------------------------------------------|-------------------------------------------------------------|------------|
| 4.50         | 0.47122                                                     | 3.13444                                                     | 0.05289    |
| 4.75         | 0.42955                                                     | 2.93622                                                     | 0.03255    |
| 5.00         | 0.4032                                                      | 2.78395                                                     | 0.03079    |
| 5.25         | 0.38574                                                     | 2.65712                                                     | 0.03649    |
| 5.50         | 0.35361                                                     | 2.55904                                                     | 0.01565    |
| 5.75         | 0.33963                                                     | 2.4536                                                      | 0.01536    |
| 6.00         | 0.32793                                                     | 2.36935                                                     | 1.02555E-5 |
| 6.25         | 0.30033                                                     | 2.23252                                                     | 0.05523    |
| 6.50         | 0.25249                                                     | 2.14083                                                     | 0.06483    |
| 6.75         | 0.16797                                                     | 2.04945                                                     | 0.07991    |
| 7.00         | 0.40735                                                     | 2.03833                                                     | 1.40246E-5 |

## References

- 1 W. Huang, B. M. Upton, S. I. Khan and P. L. Diaconescu, *Organometallics*, 2013, **32**, 1379-1386.
- 2 S. J. Lyle and M. M. Rahman, *Talanta*, 1963, **10**, 1177-1182.
- 3 Bruker, *APEX 3 and SAINT*, 2016, B. A. Inc., Madison, Wisconsin, USA.
- 4 G. Sheldrick, *Acta Crystallographica Section A*, 2015, **71**, 3-8.
- 5 G. M. Sheldrick, *Acta Crystallogr., Sect. C: Struct. Chem.*, 2015, **71**, 3-8.

- 6 L. Krause, R. Herbst-Irmer, G. M. Sheldrick and D. Stalke, *J. Appl. Crystallogr.*, 2015, **48**, 3-10.
